# Supplementary material for: Delineating the distinct role of AKT in mediating cell survival and proliferation induced by CD154 and IL-4/IL-21 in chronic lymphocytic leukemia
Source: PubMed Central journal article supplement (PMC5732702; doi:10.18632/oncotarget.22292), 2017-11-07
Supplement: oncotarget-08-102948-s001.pdf [file oncotarget-08-102948-s001.pdf]

## Delimiting the distinct role of AKT in mediating cell survival and proliferation induced by CD154 and IL-4/IL-21 in chronic lymphocytic leukemia

### SUPPLEMENTARY MATERIALS

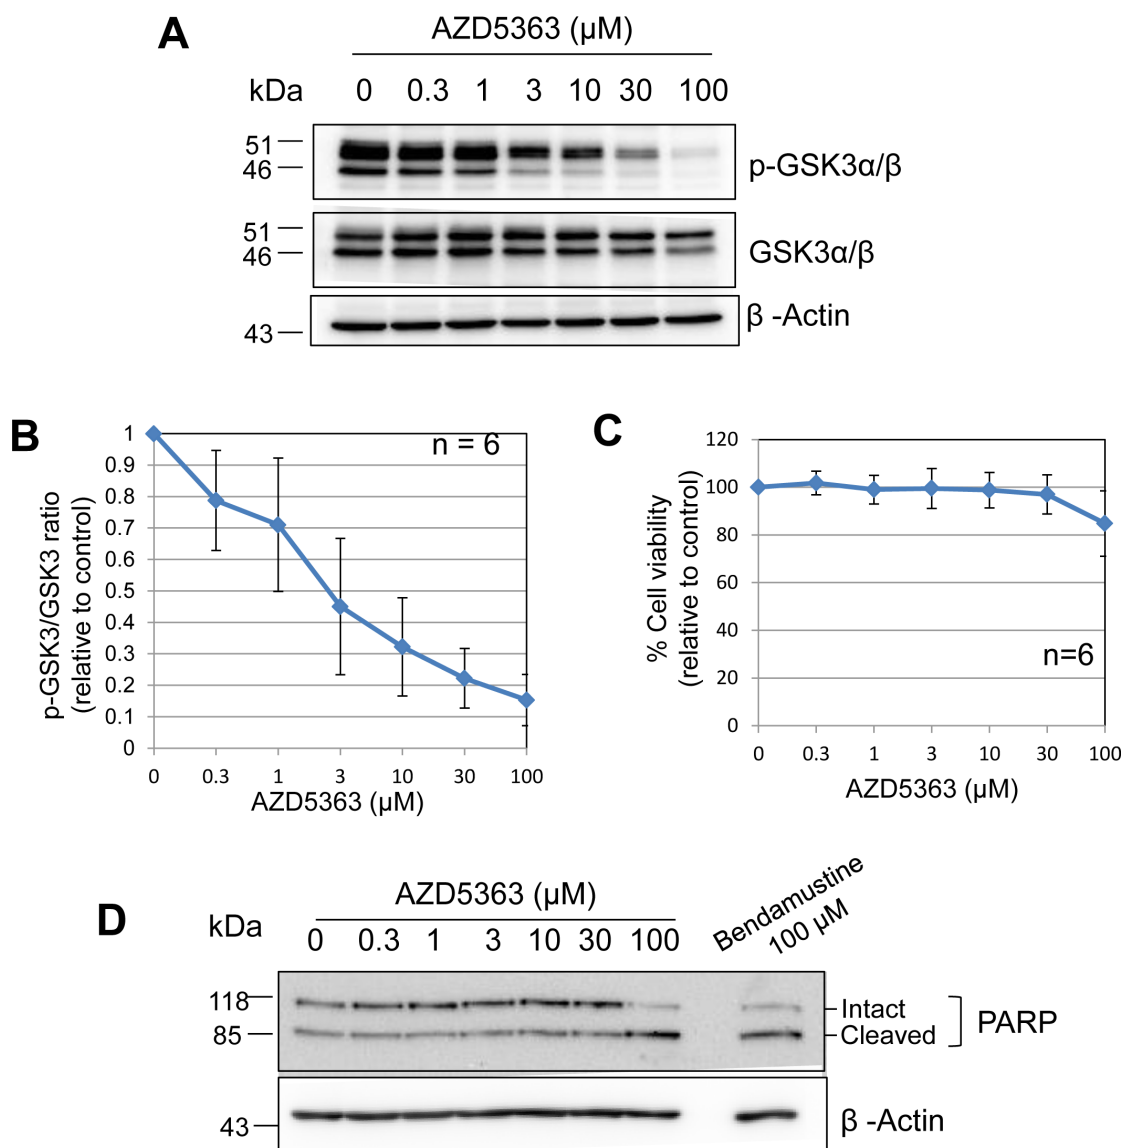

**Supplementary Figure 1: AKT inhibitor AZD5363 inhibits AKT activity in primary CLL cells under standard culture condition.** (A) Primary CLL cells were incubated for 24 h with AZD5363 at the indicated concentrations and then examined by Western blotting for levels of phosphorylated GSK3 $\alpha/\beta$  as a measure of AKT activity. Total GSK3 $\alpha/\beta$  and  $\beta$ -actin were used as loading controls. One representative blot from 6 CLL samples examined is shown. (B) Densitometry analysis of the signals corresponding to phosphorylated and total GSK3 $\alpha/\beta$  in CLL cells was performed to quantify the effect of AZD5363 on AKT activity. (C) Following incubation with AZD5363 as in A, viability of CLL cells was measured by propidium iodide (PI) exclusion and flow cytometry. (D) A representative blot of PARP cleavage in CLL cells treated with AZD5363 as in A is shown. PARP cleavage induced by bendamustine in CLL cells was used as a positive control.

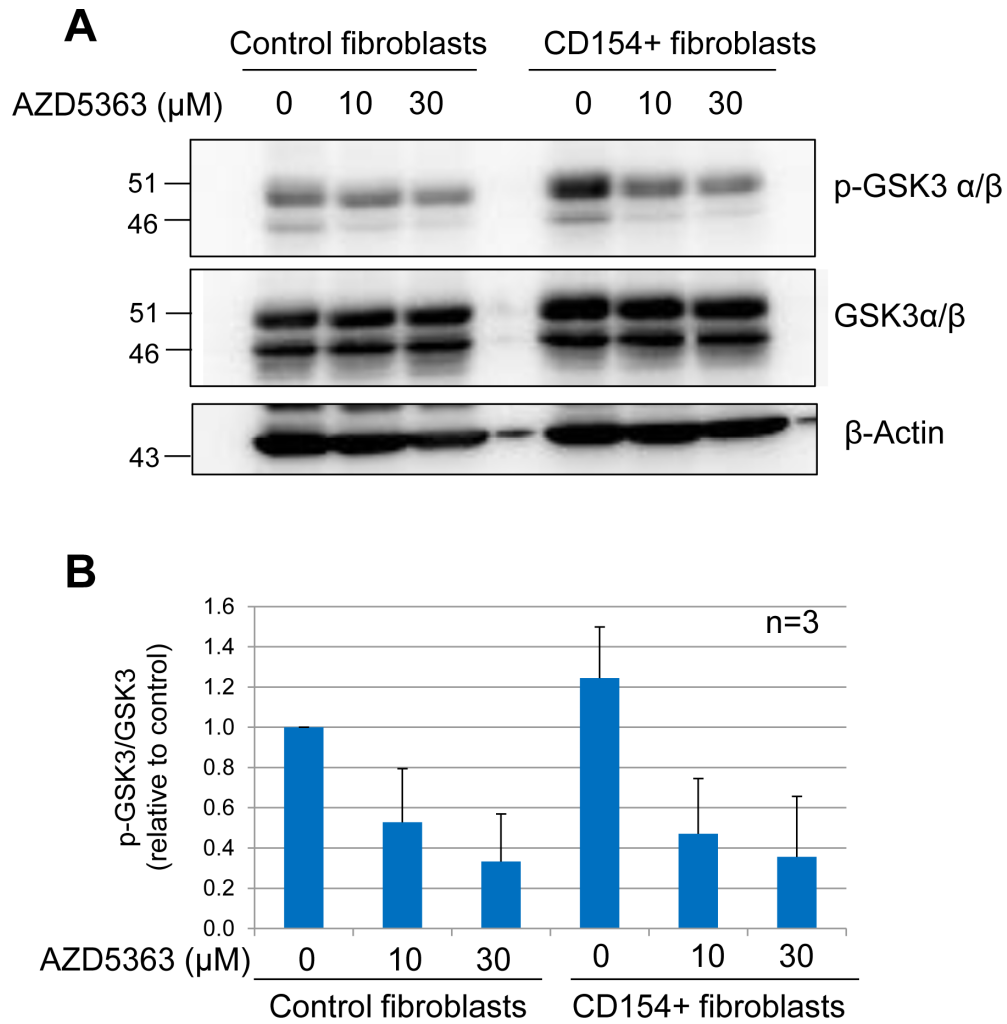

**Supplementary Figure 2: FAKT inhibitor AZD5363 inhibits AKT activity in CD40-stimulated CLL cells.** (A) CLL cells were cultured on a monolayer of control or CD154-expressing fibroblasts for 24 h in the absence or presence of AZD5363 at the indicated concentration. At the end of incubation, co-cultured CLL cells were harvested and analysed for expression levels of p-GSK and total GSK by Western blotting.  $\beta$ -actin was probed as a loading control. One representative blot from 3 CLL samples examined is shown. (B) shows a pooled densitometry data analysis of the effect of AZD5363 on levels of p-GSK in co-cultured CLL cells. In this graph, each bar represents the mean  $\pm$  SD.

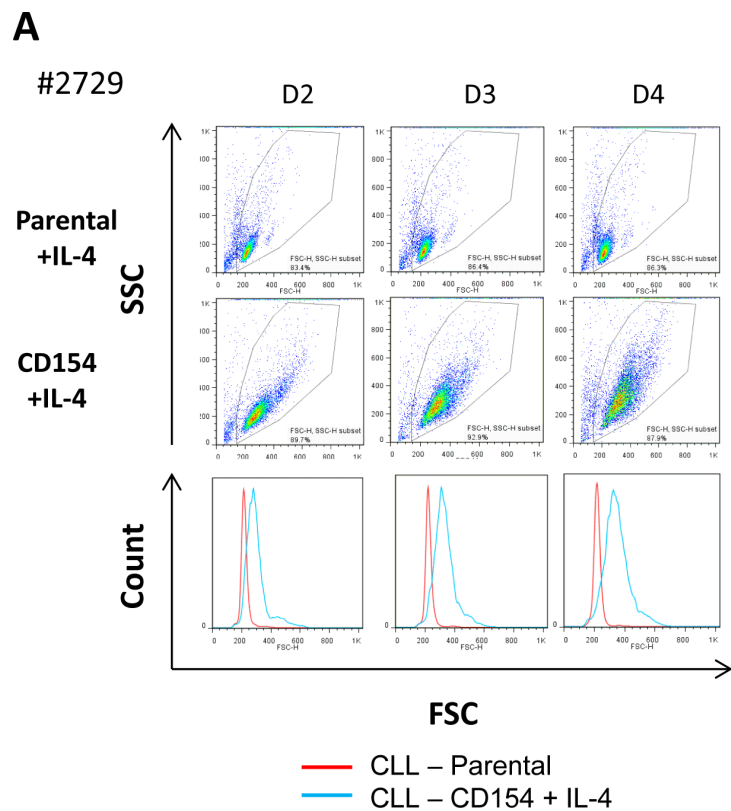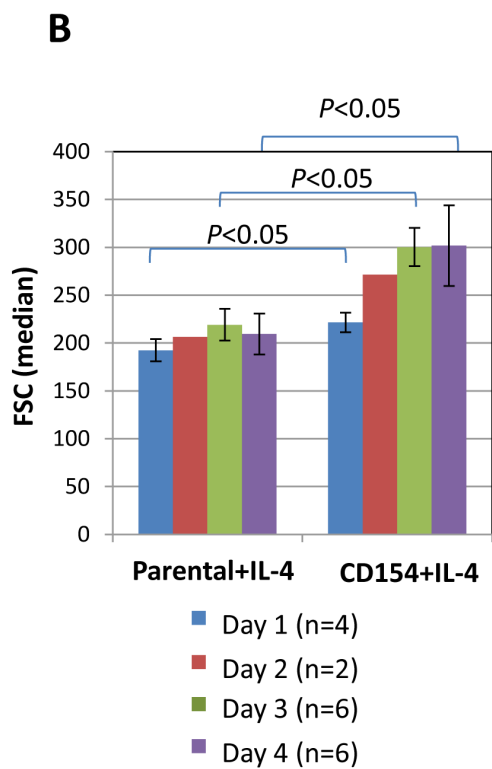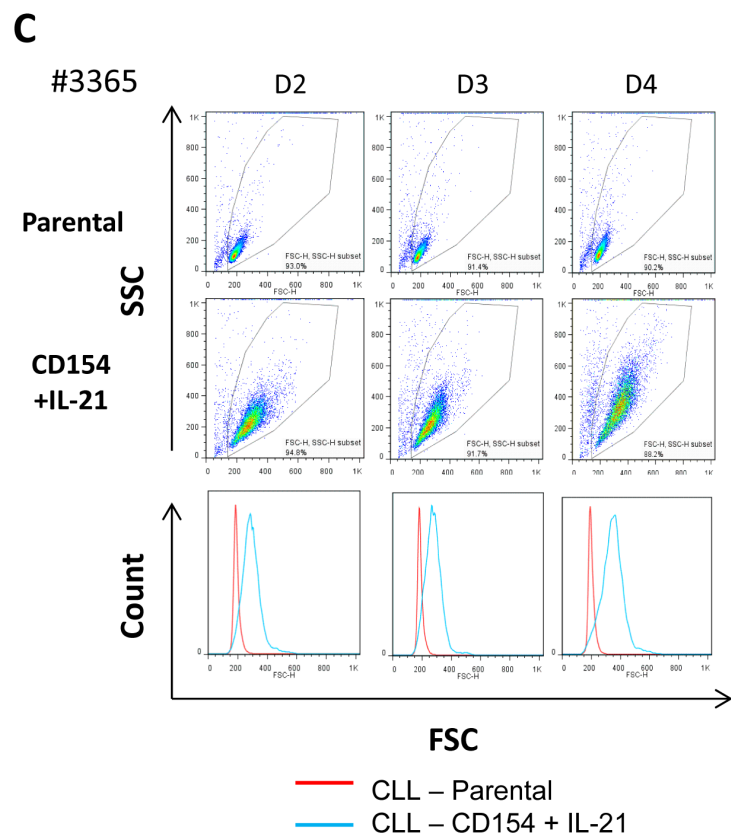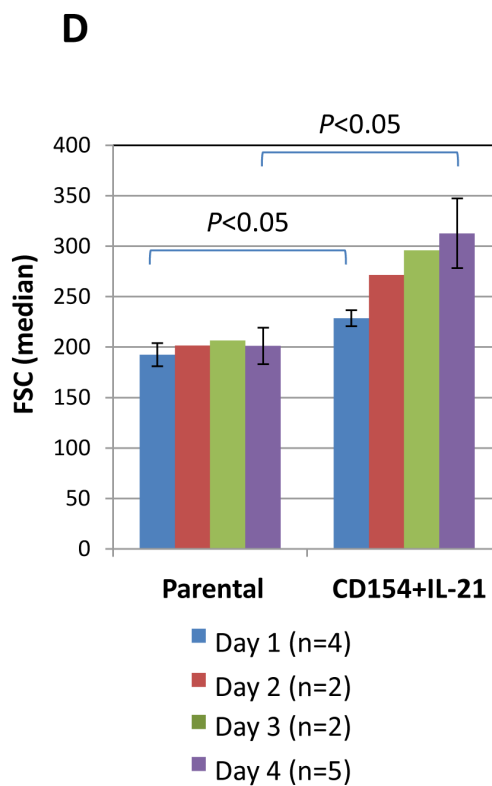

**E**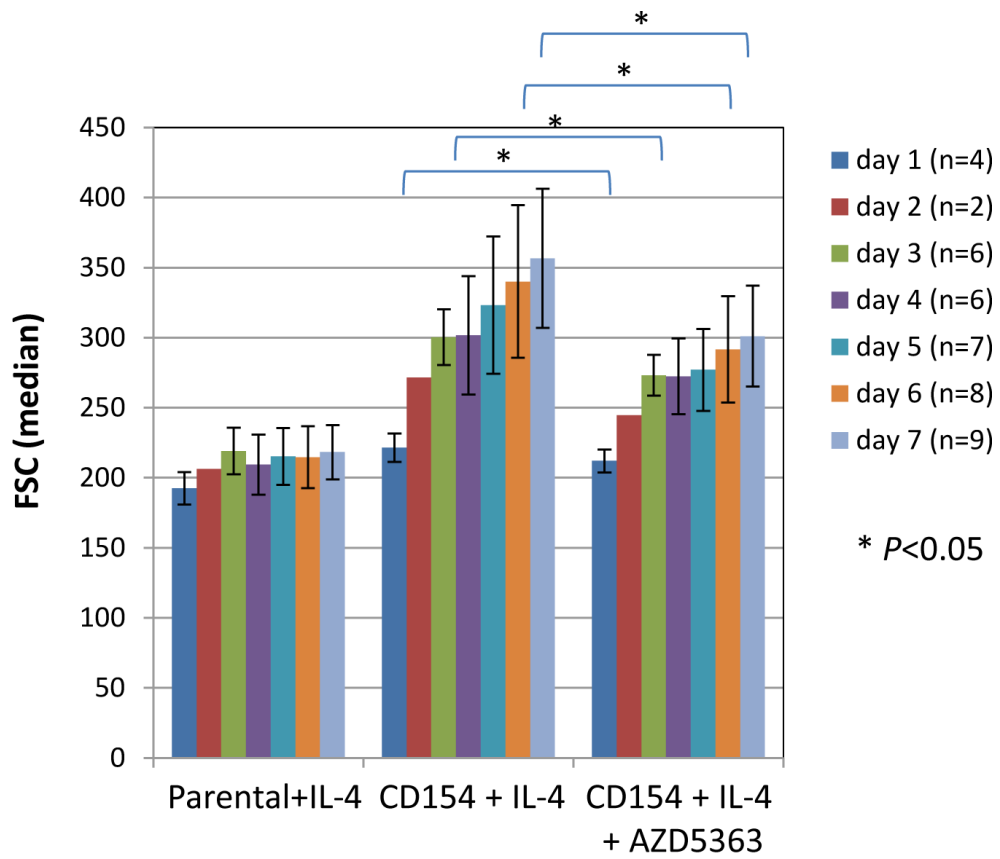**F**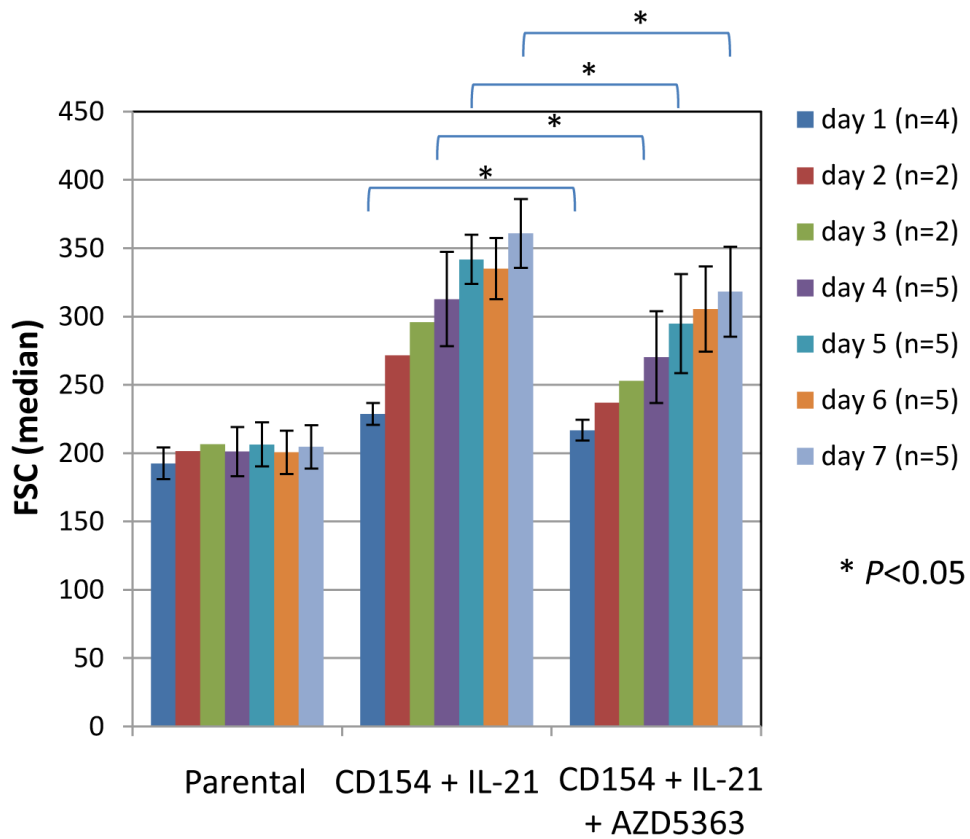

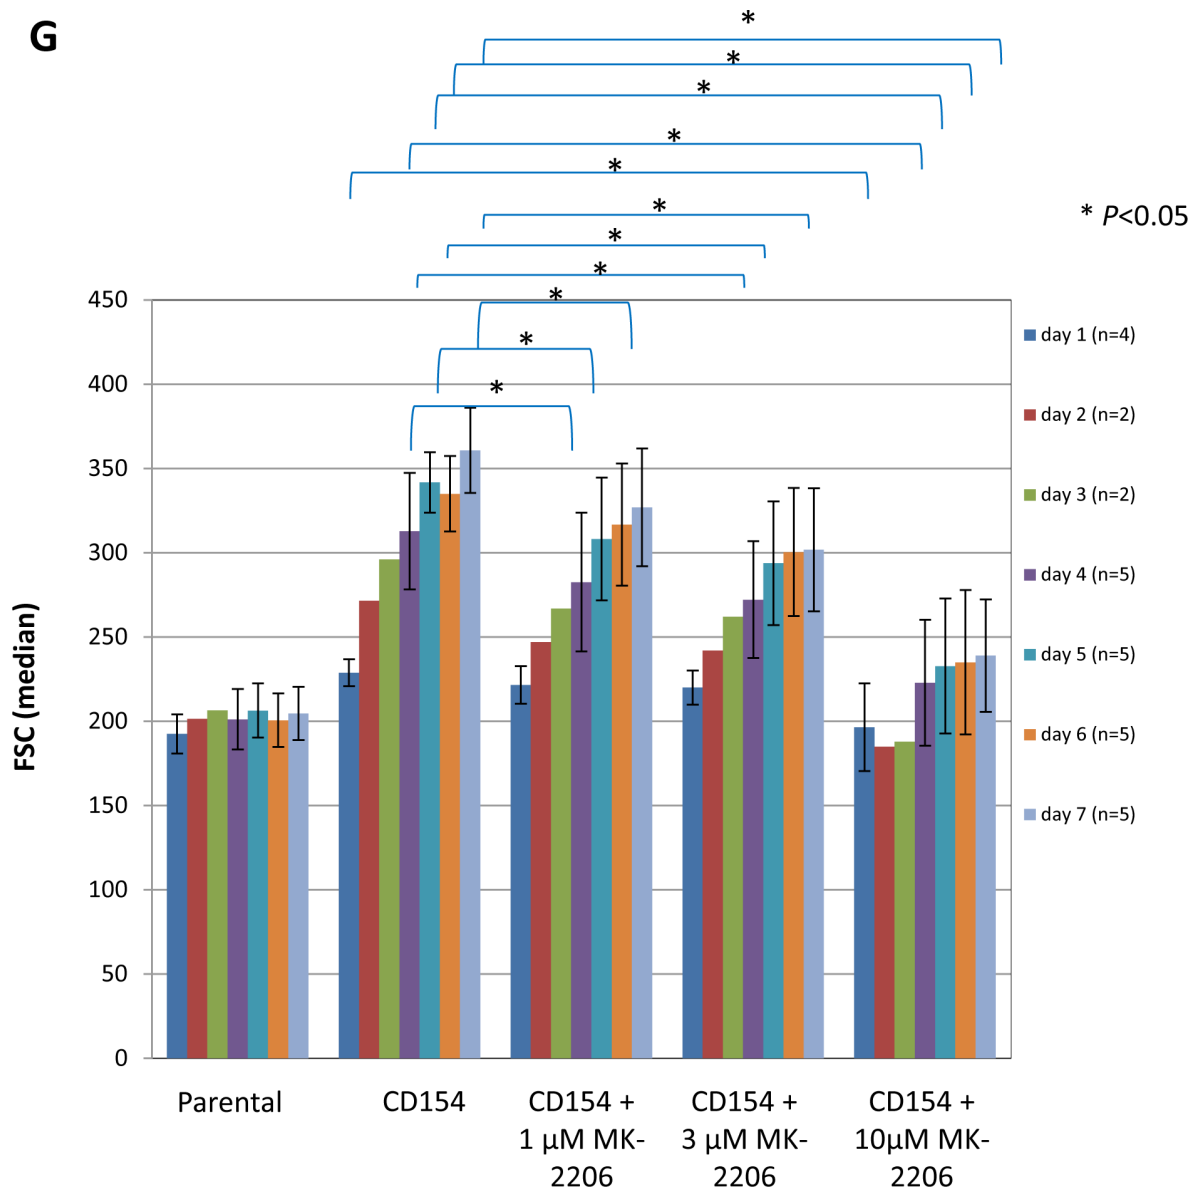

**Supplementary Figure 3: AKT inhibition reduces CD40 stimulation-induced cell size increase in CLL cells.** (A) CLL cells were cultured on a monolayer of parental or CD154-expressing fibroblasts in the presence of recombinant human IL-4 (10 ng/ml) for the indicated times. At the end of incubation, CLL cells were harvested and analysed for cell size according to their forward light scatter (FSC) properties on a flow cytometer. Representative cytograms depicting side scatter (SSC) versus FSC, and FSC histograms of co-cultured CLL cells from one patient are shown. (B) Pooled analysis of median FSC of CLL cells co-cultured as in (A) showed a time-dependent increase in cell size in response to CD40 stimulation. (C) CLL cells were co-cultured as in (A) in the presence of recombinant human IL-21 (12.5 ng/ml) for the indicated times. At the end of incubation, CLL cells were harvested and analysed for cell size by flow cytometry as in (A). Representative cytograms are shown. (D) Pooled analysis of median FSC of CLL cells co-cultured as in (C) showed a time-dependent increase in cell size in response to CD40 stimulation. (E) AKT inhibitor (AZD5363, 10  $\mu$ M) inhibited the increase in cell size of CLL cells induced by CD40 + IL-4 stimulation. (F) AKT inhibitor (AZD5363, 10  $\mu$ M) inhibited the increase in cell size of CLL cells induced by CD40 + IL-21 stimulation. (G) AKT inhibitor (MK-2206) inhibited the increase in cell size of CLL cells induced by CD40 + IL-21 stimulation in a time- and concentration-dependent manner.

#3106, day 5

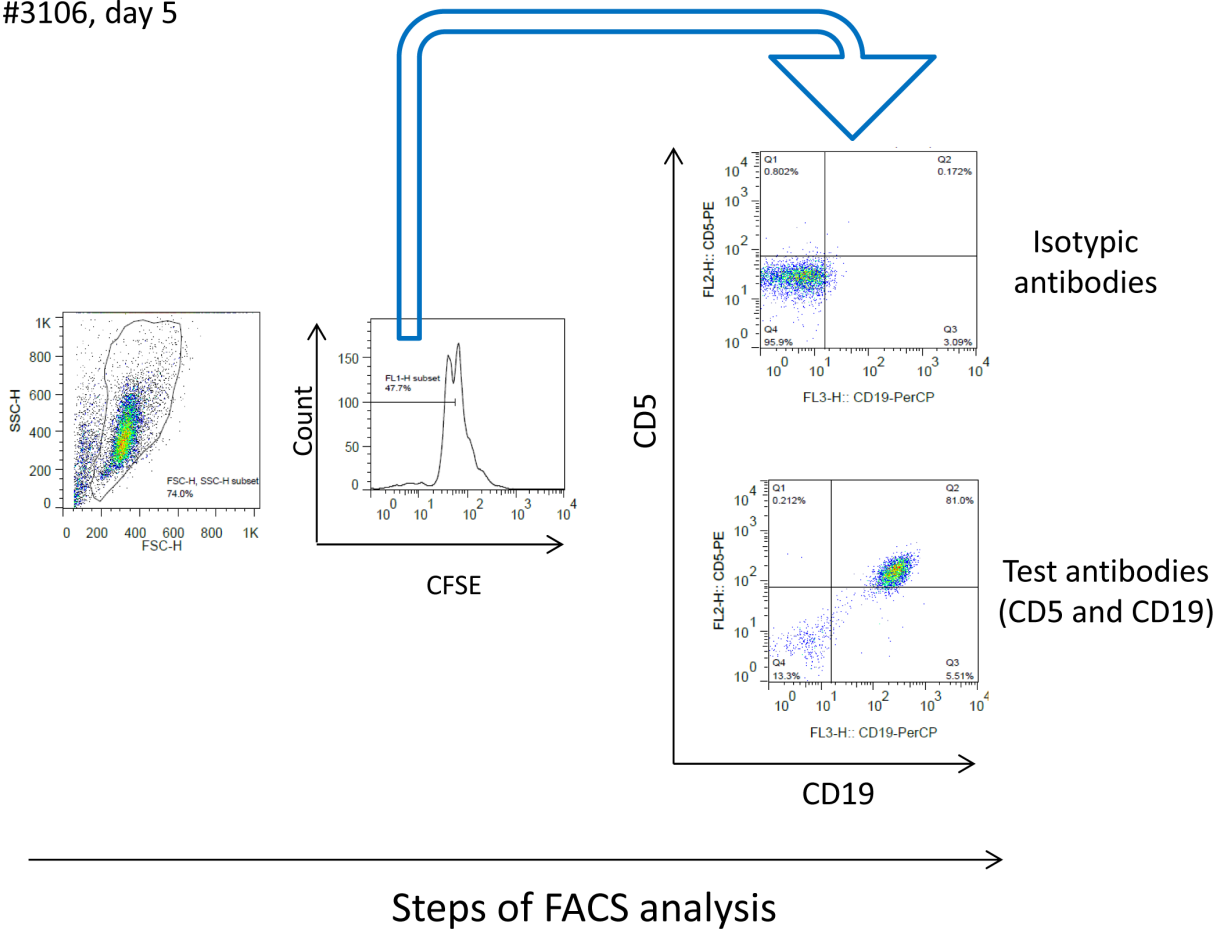

Supplementary Figure 4: Workflow of monitoring CD5<sup>+</sup> & CD19<sup>+</sup> double positive CLL-cell population from the divided cells as defined by reduction in CFSE fluorescence on FACS.

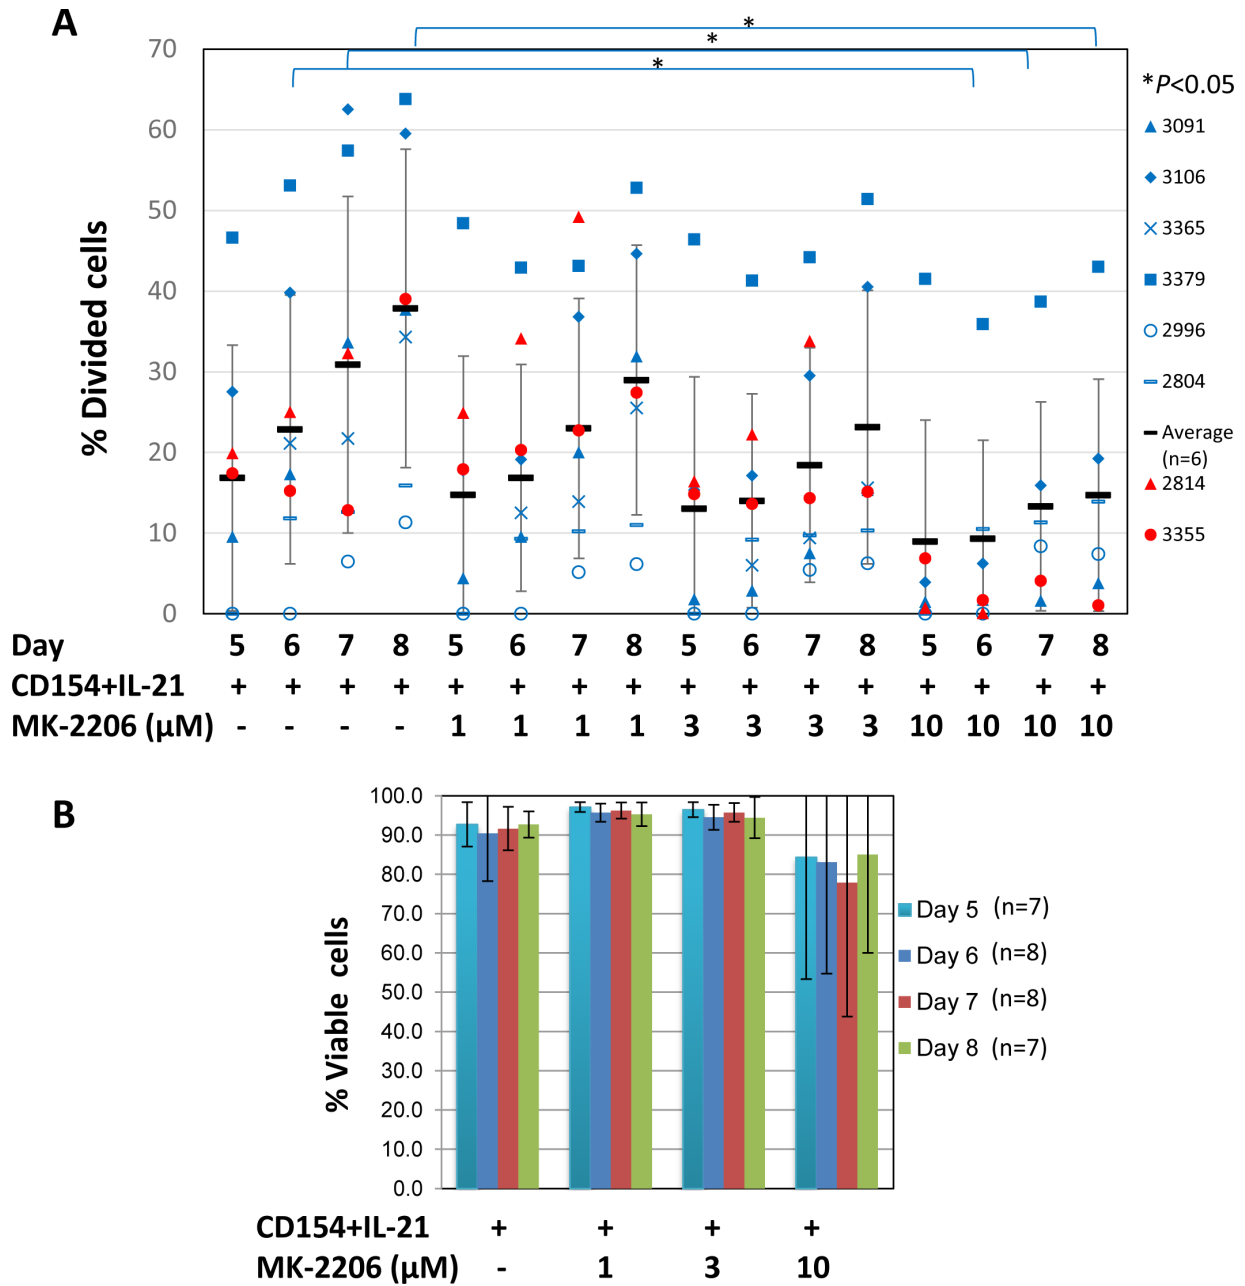

**Supplementary Figure 5: AKT is required for CD154+ IL-21-induced proliferation in CLL cells from some but not all patients.** (A) CFSE labelled CLL cells were co-cultured with CD154-expressing fibroblasts in the presence of recombinant human IL-21 (12.5 ng/ml) in the presence or absence of MK-2206 at the indicated concentrations over a period of 8 days. Proliferation was measured as described in Figure 3A and percentage of divided cells calculated as in Figure 3B. Data from samples that were responsive to inhibition of proliferation by MK-2206 as indicated by blue symbols is represented by mean  $\pm$  SD from independent experiments using CLL cells from six different patients. Data from samples where proliferation was not inhibited by MK-2206 is indicated with red symbols. (B) Viability of co-cultured CLL cells as in (A) was determined as in Figure 4C. Pooled data analysis showed that MK-2206 at 1 and 3  $\mu\text{M}$  concentrations had no effect on cell viability of co-cultured cells. The cell viability of co-cultured cells treated with MK-2206 (10  $\mu\text{M}$ ) was reduced, even though the reduction was not statistically significant.
